# Supplementary material for: ChAdOx1 nCoV-19 protection against SARS-CoV-2 in rhesus macaque and ferret challenge models
Source: PubMed Central journal article supplement (PMC8313674; doi:10.1038/s42003-021-02443-0), 2021-07-26
Supplement: 42003_2021_2443_MOESM2_ESM.pdf [file 42003_2021_2443_MOESM2_ESM.pdf]

## Description of Additional Supplementary Files

File Name: Supplementary Data 1

Description: Source Data
